# Supplementary material
Source: bioRxiv or medRxiv preprint supplement (https://medrxiv.org/highwire/filestream/72456/field_highwire_adjunct_files/1/2020.02.20.20025684-2.pdf)
Supplement: Supplementary file [file 2020.02.20.20025684-2.pdf]

## **Comparison of specified vs. conducted statistical analyses in clinical trials: *Protocol***

**Version: 1.0**

**Date: July 26<sup>th</sup> 2018**

### **Project outline**

We will conduct a review of published clinical trials in six high impact general medical journals to assess (a) how often a pre-specified statistical analysis approach is available for the primary outcome (either in a publicly available protocol or Statistical Analysis Plan); and (b) how often there are no unflagged changes or additions to the pre-specified analysis approach in the final results article (in the subset of trials with a pre-specified analysis approach).

### **Sources of data extraction**

- Final results article: this will be available for all trials
- Protocol (published and referenced within the final results article, available with final results article, or available on a trial website): this will be available for some trials
- Statistical Analysis Plan (SAP) (published and referenced within the final results article, available with final results article, or available on a trial website): this will be available for some trials

### **Inclusion/exclusion criteria**

- Inclusion criteria:
  - Published in one of the six general medical journals listed below
  - Randomised trial in humans
  - Phase 2, 3, or 4
- Exclusion criteria:
  - Pilot or feasibility
  - Phase I
  - Non-randomised
  - Secondary analysis of previously published trial
  - Cost-effectiveness as primary outcome
  - More than 1 trial reported in article
  - Results of an interim analysis
  - Protocol and/or SAP not in English

### **Search strategy**

We will perform a PubMed search for randomized controlled trials published between (and including) January and April 2018 in six top medical journals: the British Medical Journal (BMJ); Journal of the American Medical Association (JAMA); The Lancet; New England Journal of Medicine (NEJM); PLOS medicine; and The Annals of internal medicine. The search strategy will involve MeSH term and keyword searching in the title and abstract. Specifically we will search for articles with a publication type of “randomized controlled trial” or categorised with the MeSH term “random allocation,” or including any of the following terms in the title or abstract: random, randomly, randomi\*e or randomi\*ed.

One author (SC) will screen the title and abstract of each paper collected from the initial search to identify relevant studies based on study inclusion and exclusion criteria.

For all eligible studies identified in the selection stage one author (SC) will electronically search whether a protocol and/or SAP is available with the final results article (e.g. as supplementary material) to obtain these documents. The references of the published article will also be searched to establish whether a published protocol and/or SAP is available. Where available, published protocol and/or SAPs will also then be obtained along with any additional supplementary material published alongside the full results article.

### **Extraction**

Data will be extracted onto a standardised data extraction form. For each article data extraction will be performed by two reviewers independently. Any disagreements will be resolved by discussion, or decided by a third reviewer of the disagreement cannot be resolved by discussion.

### **Primary outcome**

We will extract data related to the primary outcome; the exact criteria for determining the primary outcome is listed in the data extraction form. When the primary outcome listed in the final results document is different to that listed in the protocol or SAP, we will base extractions on the outcome in the final results document.

### **Primary analysis**

We will extract data related to the primary analysis of the primary outcome. We will identify the *primary* analysis as follows:

1. If only one analysis strategy is used for the primary outcome in the final results paper, use this
2. If multiple analysis strategies are used for the primary outcome in the final results paper:
  - a. If one is listed as the primary analysis strategy, use this
  - b. If none are listed as the primary analysis strategy, use the analysis strategy which is presented first in the results section of the final results paper

*Note:* if the Final Results Article refers to supplementary material or a SAP or protocol for further details on the analysis approach used, the extractor should refer to these documents.

### **Definition of change and addition**

The method of analysis for the primary outcome in the Final Results Article (published article) will be compared to the method of analysis specified in the earliest available protocol/SAP (Original Document).

**Change:** when the analysis approach used in the Final Results Article is different to that specified in the Original Document.

Examples include:

- Protocol stated analysis would use ITT, but in Final Results Article the analysis used per-protocol
- Protocol stated primary analysis would use a Chi-square test, but Final Results Article used a Fisher's exact test
- Protocol stated primary analysis would use generalised estimating equations, but Final Results Article used a mixed-effects model
- Protocol stated the primary analysis would adjust for age and gender, but in Final Results Article the primary analysis adjusted for age, gender, and centre

- Protocol stated analysis would use multiple imputation, but in Final Results Article the analysis used complete case
- Protocol stated analysis would use multiple imputation with chained equations, but Final Results Article used multiple imputation using multivariate normal

**Addition:** when the Original Document either (a) contained insufficient detail on the analysis method, which was subsequently added in the Final Results Article; or (b) specified multiple potential approaches without providing any formal criteria for choosing which is the primary, and one of the approaches is chosen for the Final Results Article based on subjective criteria.

Examples include:

- Protocol states the analysis will use per-protocol, but does not define which patients would be excluded; Final Results Article specifies that patients who received <50% of trial medication were excluded.
- Protocol states that primary analysis will use either per-protocol or ITT, but does not specify which. Final Results Article uses ITT for primary analysis.
- Protocol states that analysis will adjust for covariates found to be prognostic, but does not give a list of potential covariates to choose from. Final Results Article states which covariates were adjusted for.
- Protocol states that analysis will adjust for covariates found to be prognostic, and gives a list of potential variables to choose from; however it does not give any formal criteria for determining which covariates are prognostic, allowing the analysis to subjectively choose which covariates will be included in the analysis. Final Results Article states which covariates were adjusted for.
- Protocol states that analysis will use either Fisher's exact test or a Chi-square test. Final Results Article uses Chi-Square test.
- Protocol states that analysis will be via generalised estimating equations, but does not give any information on which working correlation structure will be used; Final Results Article specifies that an exchangeable correlation structure was used
- Protocol states that a transformation will be used if the outcome is not normally distributed, but does not provide any formal criteria for choosing a transformation; Final Results Article states a log-transformation was used, as this provided the closest distribution to normal based on a visual inspection of QQ plots
- Protocol states multiple imputation will be used, but provides no detail on how this will be implemented. Final Results Article provides imputation model and other relevant details.
- Protocol states either multiple imputation or complete case will be used, depending on pattern of missing data. Final Results Article states complete case was used.
- Protocol states multiple imputation using chained equations will be used, and baseline variables associated with outcome will be used in the imputation model, but does not give either (a) a set of possible baseline variables to choose from; or (b) formal criteria for determining whether each variable is associated with outcome. Final Results Article gives list of baseline variables used in imputation model.

### **Definition of ‘flagged’ vs. ‘unflagged’**

A change or addition is defined as being ‘flagged’ if (a) the change or addition was listed in a subsequent version of the protocol or SAP; or (b) the final results article highlighted that this aspect was a change or addition from what had been pre-specified.

A change or addition is defined as being ‘unflagged’ if it both (a) and (b) above are false (i.e. if the change or addition was not listed in a subsequent version of the protocol or SAP, and the final results article did not highlight that this aspect was a change or addition from what had been pre-specified).

### **Analysis elements**

We will assess the following four analysis elements:

- Analysis population (the set of participants included in the analysis, and which treatment group they are analysed as)
- Analysis model
- Use of covariates
- Handling of missing data

### **Main outcome measures**

- Availability of a pre-specified analysis approach for the primary outcome (either in a publicly available protocol or SAP)
- Number of trials with no unflagged changes or additions to the pre-specified analysis approach in the final results article (restricted to the subset of trials with a pre-specified analysis approach)
- Total number of analysis elements with an unflagged change or addition to the pre-specified analysis approach per trial (restricted to the subset of trials with a pre-specified analysis approach)

### **Definition of main outcome measures**

#### *Availability of a pre-specified analysis approach for the primary outcome (either in a publicly available protocol or SAP)*

This is defined as ‘yes’ if there is a publicly available protocol or SAP (either published, available as supplementary material with the final results article, or available online on a trial or other website which contains at least some information about the analysis of the primary outcome. (note that this does not require the analysis approach for the primary outcome to be fully or adequately pre-specified in the protocol or SAP; it just requires there to be some detail about the analysis, even if not sufficient).

This is defined as ‘no’ if there is no publicly available protocol or SAP, or if the publicly available protocol or SAP contains no information on the analysis of the primary outcome.

#### *Number of trials with no unflagged changes or additions to the pre-specified analysis approach in the final results article (restricted to the subset of trials with a pre-specified analysis approach)*

This is restricted to the subset of trials with a pre-specified analysis approach (i.e. which are classified as 'yes' to the question above).

This is defined as 'yes' (i.e. no unflagged changes or additions) if for each analysis element (described below) there are no unflagged additions or changes.

This is defined as 'no' (i.e. there are unflagged changes or additions) if at least one analysis element has an unflagged addition or change.

Total number of analysis elements with an unflagged change or addition to the pre-specified analysis approach per trial (restricted to the subset of trials with a pre-specified analysis approach)

This is restricted to the subset of trials with a pre-specified analysis approach.

This is the number of elements with at least one unflagged change or addition; this could be 0, 1, 2, 3, or 4.

### **Secondary outcome measures**

- For each of the four analysis elements, the number of trials with at least one unflagged change or addition
- For each of the four analysis elements, the number of trials with at least one unflagged addition
- For each of the four analysis elements, the number of trials with at least one unflagged change

### **Analyses**

- All outcomes will be summarised descriptively

### **Subgroup analyses**

The outcomes listed above will be summarised separately between the different subgroups listed below.

- Funding: for-profit (pharmaceutical or other private for-profit companies only) vs. not for-profit alone
- Type of experimental intervention (pharmacologic, surgical, psychosocial/behavioural/education, other, multiple)

### **Association between changes/additions to analysis approach and p-value**

We will assess whether there is an association between our outcomes and the size of the p-value for the primary outcome. We will fit a linear model, with the log(p-value) as an outcome; this allows us to interpret regression coefficients as % changes. We will adjust for the following variables as potential confounders: journal, funding source (for-profit only vs. not for-profit only), type of experimental intervention, and sample size (sample size will be fit as a continuous variable, using restricted cubic splines with three knots). For p-values reported as less than a number (e.g. <0.001),

we will analyse these at the stated value (i.e. for a p-value reported as  $<0.001$  we will include it in the analysis as 0.001).

We will fit separate regression models for each of the following variables:

- Availability of a pre-specified analysis approach for the primary outcome (yes vs. no)
- Any unflagged changes/additions (yes vs. not) [restricted to the subset of trials with a pre-specified analysis approach]
- The number of analysis elements with an unflagged change or addition (0, 1, 2, 3, 4); this will be fit as a continuous variable, assuming a linear association with outcome.

**Comparison of specified vs. conducted statistical analyses in clinical trials: *data extraction form***

**Date: July 26<sup>th</sup> 2018**

*For fields that refer to the **primary outcome**, this should be identified as follows:*

- 1) *If only one outcome is listed as being the primary in the final results paper:*
  - a. *Use this*
- 2) *If either no outcomes or multiple outcomes are listed as being the primary in the final results paper:*
  - a. *If only one outcome was used in the sample size calculation, use this*
  - b. *If no sample size calculation was performed, or a sample size calculation was performed for multiple outcomes, use the first clinical outcome listed in the Objectives/Outcomes section of the final results paper*

**Section 1: Study Identifiers**

|                                                                                                              |                                                                                                                  |
|--------------------------------------------------------------------------------------------------------------|------------------------------------------------------------------------------------------------------------------|
| Article filename                                                                                             |                                                                                                                  |
| Journal                                                                                                      |                                                                                                                  |
| First author's last name                                                                                     |                                                                                                                  |
| Is this article eligible?                                                                                    | -yes<br>-no                                                                                                      |
| If no, why not? ( <i>freetext</i> )                                                                          |                                                                                                                  |
|                                                                                                              |                                                                                                                  |
| What is primary outcome ( <i>freetext</i> ) – this is to check reviewers are extracting data on same outcome |                                                                                                                  |
| How was this selected for data extraction?                                                                   | -only primary outcome listed<br>-used in sample size calculation<br>-first listed in Objectives/Outcomes section |
| Reviewer's name                                                                                              |                                                                                                                  |
|                                                                                                              |                                                                                                                  |
| General comments:                                                                                            |                                                                                                                  |

**Section 2: General trial characteristics**

|                                                                                                                                        |                                                                                                                                                  |
|----------------------------------------------------------------------------------------------------------------------------------------|--------------------------------------------------------------------------------------------------------------------------------------------------|
| Sample size (total number of participants randomised) –<br><i>number</i>                                                               |                                                                                                                                                  |
| Funding ( <i>select all that apply</i> )                                                                                               | -pharmaceutical company<br>-other for-profit medical company (e.g. medical device company)<br>-government body<br>-charity<br>-other<br>-unclear |
| Type of experimental intervention ( <i>select all that apply</i> )                                                                     | -pharmacologic<br>-surgical<br>-psychosocial, behavioural, educational<br>-other                                                                 |
| Trial design ( <i>select all that apply</i> )<br><i>Leave blank if none apply</i>                                                      | -cluster<br>-factorial<br>-crossover<br>-non-inferiority/equivalence                                                                             |
| Number of treatment groups                                                                                                             | -two<br>-three or more                                                                                                                           |
|                                                                                                                                        |                                                                                                                                                  |
| P-value for primary outcome: ( <i>if &gt;2 treatment arms, then take smallest p-value</i> ) ( <i>leave blank if no p-value given</i> ) |                                                                                                                                                  |
|                                                                                                                                        |                                                                                                                                                  |
| General comments:                                                                                                                      |                                                                                                                                                  |



### Section 3: Other trial characteristics

|                                                                                                                                              |                                                                  |
|----------------------------------------------------------------------------------------------------------------------------------------------|------------------------------------------------------------------|
| Date recruitment began:                                                                                                                      | <i>mmm/yyyy</i>                                                  |
| Date recruitment ended:                                                                                                                      | <i>mmm/yyyy</i>                                                  |
| Did article state statistician was kept blind until after SAP was signed off? ( <i>note: this could also be stated in protocol or SAP</i> )  | -Yes<br>-No<br>-Unclear                                          |
| Did article state statistician was kept blind until after database was locked? ( <i>note: this could also be stated in protocol or SAP</i> ) | -Yes<br>-No<br>-Unclear                                          |
| Protocol available?                                                                                                                          | -Yes<br>-No                                                      |
| If yes:                                                                                                                                      |                                                                  |
| From which source(s) was the protocol available? ( <i>select all that apply</i> )                                                            | -published<br>-supplementary material<br>-trial or other website |
| Date of earliest version of protocol available:<br>( <i>if only one version available, give data here</i> )                                  | <i>mmm/yyyy</i>                                                  |
| Date of latest version of protocol available:<br>( <i>leave blank if only one version available</i> )                                        | <i>mmm/yyyy</i>                                                  |
| Separate SAP available?                                                                                                                      | -Yes<br>-No                                                      |
| If yes:                                                                                                                                      |                                                                  |
| From which source(s) was the SAP available? ( <i>select all that apply</i> )                                                                 | -published<br>-supplementary material<br>-trial or other website |
| Date of earliest version of SAP available:<br>( <i>if only one version available, give data here</i> )                                       | <i>mmm/yyyy</i>                                                  |
| Date of latest version of SAP available:<br>( <i>leave blank if only one version available</i> )                                             | <i>mmm/yyyy</i>                                                  |
| General comments:                                                                                                                            |                                                                  |

***If there is no protocol/SAP available, skip sections 4-8.***

**Section 4: Comparison between Final Results Article and protocol/SAP - general**

|                                                                                                                                                 |                                                                                                                                                             |
|-------------------------------------------------------------------------------------------------------------------------------------------------|-------------------------------------------------------------------------------------------------------------------------------------------------------------|
| What is this comparison based on? (referred to as the Original Document [OD]) ( <i>this should be the earliest available document</i> )         | -Protocol version 1.0<br>-Protocol later version<br>-Protocol (version unspecified)<br>-SAP version 1.0<br>-SAP later version<br>-SAP (version unspecified) |
| Is there at least some information about the statistical analysis of the primary outcome in the protocol/SAP?<br><br>(if no, skip sections 5-8) | -yes<br>-no                                                                                                                                                 |
|                                                                                                                                                 |                                                                                                                                                             |
| General comments:                                                                                                                               |                                                                                                                                                             |

**Section 5: Comparison between Final Results Article and protocol/SAP – Analysis Population**

| <b>Analysis population for primary analysis</b>                                                                                           |                                                                                      |
|-------------------------------------------------------------------------------------------------------------------------------------------|--------------------------------------------------------------------------------------|
| Was something changed from the Original Document (OD)?                                                                                    | -Yes<br>-No<br>-Unclear                                                              |
| Were all changes flagged?                                                                                                                 | -Yes<br>-No<br>-Unclear<br>-NA                                                       |
| If yes, where were they <i>first</i> flagged? (if multiple changes, state answer for latest flagged change)<br><br>(if no, leave blank)   | -later version of protocol<br>-later version of SAP<br>-final results article<br>-NA |
| Freetext description of all flagged changes:                                                                                              |                                                                                      |
| Freetext description of all unflagged changes:                                                                                            |                                                                                      |
|                                                                                                                                           |                                                                                      |
| Was something added that was not specified in OD?                                                                                         | -Yes<br>-No<br>-Unclear                                                              |
| Were all additions flagged?                                                                                                               | -Yes<br>-No<br>-Unclear<br>-NA                                                       |
| If yes, where were they <i>first</i> flagged? (if multiple changes, state answer for latest flagged addition)<br><br>(if no, leave blank) | -later version of protocol<br>-later version of SAP<br>-final results article<br>-NA |
| Freetext description of all flagged additions:                                                                                            |                                                                                      |
| Freetext description of all unflagged additions:                                                                                          |                                                                                      |
|                                                                                                                                           |                                                                                      |
| General comments:                                                                                                                         |                                                                                      |

**Section 6: Comparison between Final Results Article and protocol/SAP – Analysis Model**

| <b>Analysis Model for primary analysis</b>                                                                                                                  |                                                                                      |
|-------------------------------------------------------------------------------------------------------------------------------------------------------------|--------------------------------------------------------------------------------------|
| Was something changed from Original Document (OD)?                                                                                                          | -Yes<br>-No<br>-Unclear                                                              |
| Were all changes flagged?                                                                                                                                   | -Yes<br>-No<br>-Unclear<br>-NA                                                       |
| If yes, where were they <i>first</i> flagged? ( <i>if multiple changes, state answer for latest flagged change</i> )<br><br>( <i>if no, leave blank</i> )   | -later version of protocol<br>-later version of SAP<br>-final results article<br>-NA |
| Freetext description of all flagged changes:                                                                                                                |                                                                                      |
| Freetext description of all unflagged changes:                                                                                                              |                                                                                      |
|                                                                                                                                                             |                                                                                      |
| Was something added that was not specified in OD?                                                                                                           | -Yes<br>-No<br>-Unclear                                                              |
| Were all additions flagged?                                                                                                                                 | -Yes<br>-No<br>-Unclear<br>-NA                                                       |
| If yes, where were they <i>first</i> flagged? ( <i>if multiple changes, state answer for latest flagged addition</i> )<br><br>( <i>if no, leave blank</i> ) | -later version of protocol<br>-later version of SAP<br>-final results article<br>-NA |
| Freetext description of all flagged additions:                                                                                                              |                                                                                      |
| Freetext description of all unflagged additions:                                                                                                            |                                                                                      |
|                                                                                                                                                             |                                                                                      |
| General comments:                                                                                                                                           |                                                                                      |

**Section 7: Comparison between Final Results Article and protocol/SAP – Use of Covariates**

| <b>Use of Covariates for primary analysis</b>                                                                                                               |                                                                                      |
|-------------------------------------------------------------------------------------------------------------------------------------------------------------|--------------------------------------------------------------------------------------|
| Was something changed from Original Document (OD)?                                                                                                          | -Yes<br>-No<br>-Unclear                                                              |
| Were all changes flagged?                                                                                                                                   | -Yes<br>-No<br>-Unclear<br>-NA                                                       |
| If yes, where were they <i>first</i> flagged? ( <i>if multiple changes, state answer for latest flagged change</i> )<br><br>( <i>if no, leave blank</i> )   | -later version of protocol<br>-later version of SAP<br>-final results article<br>-NA |
| Freetext description of all flagged changes:                                                                                                                |                                                                                      |
| Freetext description of all unflagged changes:                                                                                                              |                                                                                      |
|                                                                                                                                                             |                                                                                      |
| Was something added that was not specified in OD?                                                                                                           | -Yes<br>-No<br>-Unclear                                                              |
| Were all additions flagged?                                                                                                                                 | -Yes<br>-No<br>-Unclear<br>-NA                                                       |
| If yes, where were they <i>first</i> flagged? ( <i>if multiple changes, state answer for latest flagged addition</i> )<br><br>( <i>if no, leave blank</i> ) | -later version of protocol<br>-later version of SAP<br>-final results article<br>-NA |
| Freetext description of all flagged additions:                                                                                                              |                                                                                      |
| Freetext description of all unflagged additions:                                                                                                            |                                                                                      |
|                                                                                                                                                             |                                                                                      |
| General comments:                                                                                                                                           |                                                                                      |

**Section 8: Comparison between Final Results Article and protocol/SAP – Handling of Missing Data**

| <b>Handling of Missing Data for primary outcome</b>                                                                                       |                                                                                      |
|-------------------------------------------------------------------------------------------------------------------------------------------|--------------------------------------------------------------------------------------|
| Was something changed from Original Document (OD)?                                                                                        | -Yes<br>-No<br>-Unclear                                                              |
| Were all changes flagged?                                                                                                                 | -Yes<br>-No<br>-Unclear<br>-NA                                                       |
| If yes, where were they <i>first</i> flagged? (if multiple changes, state answer for latest flagged change)<br><br>(if no, leave blank)   | -later version of protocol<br>-later version of SAP<br>-final results article<br>-NA |
| Freetext description of all flagged changes:                                                                                              |                                                                                      |
| Freetext description of all unflagged changes:                                                                                            |                                                                                      |
|                                                                                                                                           |                                                                                      |
| Was something added that was not specified in OD?                                                                                         | -Yes<br>-No<br>-Unclear                                                              |
| Were all additions flagged?                                                                                                               | -Yes<br>-No<br>-Unclear<br>-NA                                                       |
| If yes, where were they <i>first</i> flagged? (if multiple changes, state answer for latest flagged addition)<br><br>(if no, leave blank) | -later version of protocol<br>-later version of SAP<br>-final results article<br>-NA |
| Freetext description of all flagged additions:                                                                                            |                                                                                      |
| Freetext description of all unflagged additions:                                                                                          |                                                                                      |
|                                                                                                                                           |                                                                                      |
| General comments:                                                                                                                         |                                                                                      |
